# Supplementary material for: KLF4 Induces Mesenchymal–Epithelial Transition (MET) by Suppressing Multiple EMT-Inducing Transcription Factors
Source: MDPI journal article supplement (doi:10.3390/cancers13205135), 2021-10-13
Supplement: s1 [file s1]

## File S1: KLF4\_SI

The dynamics of the molecular species of the EMT regulatory circuit (miR-200, Snail, Zeb, Slug) and KLF4 (shown in Fig 1A) is described using coupled ordinary differential equations.

$$\frac{d\mu_{200}}{dt} = g_{\mu_{200}} H^s(Z, \lambda_{Z, \mu_{200}}) H^s(S, \lambda_{S, \mu_{200}}) H^s(Sl, \lambda_{Sl, \mu_{200}}) - m_Z Y_{\mu}(\mu_{200}) - m_{Sl} Y_{\mu}(\mu_{200}) - k_{\mu_{200}} \mu_{200}$$

$$\frac{dm_Z}{dt} = g_{m_Z} H^s(Z, \lambda_{Z, m_Z}) H^s(S, \lambda_{S, m_Z}) - m_Z Y_Z(\mu_{200}) - k_{m_Z} m_Z$$

$$\frac{dZ}{dt} = g_Z m_Z L(\mu_{200}) - k_Z Z$$

$$\frac{dS}{dt} = g_S H^s(I, \lambda_{I, S}) H^s(Sl, \lambda_{Sl, S}) H^s(S, \lambda_{S, S}) H^s(K, \lambda_{K, m_S}) - k_S S$$

$$\frac{dm_{Sl}}{dt} = g_{m_{Sl}} H^s(S, \lambda_{S, m_{Sl}}) H^s(K, \lambda_{K, m_{Sl}}) - m_{Sl} Y_Z(\mu_{200}) - k_{m_{Sl}} m_{Sl}$$

$$\frac{dSl}{dt} = g_{Sl} m_{Sl} L(\mu_{200}) - k_{Sl} Sl$$

$$\frac{dK}{dt} = g_K H^s(K, \lambda_{K, K}) H^s(Sl, \lambda_{Sl, S}) H^s(S, \lambda_{S, S}) - k_S S$$

where  $g_x$  is the corresponding innate production rate and  $k_x$  is the innate degradation rate.

$m_Z L(\mu_{200})$  is the net translation rate,  $m_Z Y_{\mu}(\mu_{200})$  is the total ZEB mRNA active degradation rate and  $m_Z Y_{\mu}(\mu_{200})$  is the total miR active degradation rate.  $H^s$  is the shifted Hill function, defined as

$$H^s(B, \lambda) = H^-(B) + \lambda H^+(B),$$

$$H^-(B) = 1 / [1 + (B / B_0)^{n_B}],$$

$$H^+(B) = 1 - H^-(B),$$

$\lambda$  is the fold change from the basal synthesis rate due to protein B.  $\lambda > 1$  for activators, while  $\lambda < 1$  for inhibitors.

$\lambda < 1$  for inhibitors.

### Parameter Estimation:

The model parameters were adopted from previously published literature for the molecular species of the core circuit (I, miR-200, Snail, Zeb, Slug) and KLF4 interactions, as given below:

| Parameter                        | Value | Reference |
|----------------------------------|-------|-----------|
| $g_{\mu_{200}}$ (Molecules/Hour) | 2.1K  | [1]       |
| $g_{m_Z}$ (Molecules/Hour)       | 11    | [1]       |
| $Z^0 \mu_{200}$ (Molecules)      | 220K  | [1]       |
| $Z^0 m_Z$ (Molecules)            | 25K   | [1]       |
| $n_{Z, \mu_{200}}$               | 3     | [1]       |
| $n_{Z, m_Z}$                     | 2     | [1]       |
| $n_{\mu_{200}}$                  | 6     | [1]       |
| $n_{S, \mu_{200}}$               | 2     | [1]       |
| $n_{S, m_Z}$                     | 2     | [1]       |
| $\lambda_{Z, \mu_{200}}$         | 0.1   | [1]       |

|                                       |        |           |
|---------------------------------------|--------|-----------|
| $\lambda_{Z,m_Z}$                     | 7.5    | [1]       |
| $\lambda_{S,\mu_{200}}$               | 0.1    | [1]       |
| $\lambda_{S,m_Z}$                     | 10     | [1]       |
| $k_{\mu_{200}}$ (Hour <sup>-1</sup> ) | 0.05   | [1]       |
| $k_{m_Z}$ (Hour <sup>-1</sup> )       | 0.5    | [1]       |
| $k_Z$ (Hour <sup>-1</sup> )           | 0.1    | [1]       |
| $g_Z$ (Hour <sup>-1</sup> )           | 0.1K   | [1]       |
| $S_{\mu_{200}}^0$ (Molecules)         | 180K   | [1]       |
| $S_{m_Z}^0$ (Molecules)               | 180K   | [1]       |
| $\mu_{200}^0$ (Molecules)             | 10K    | [1]       |
| $g_S$                                 | 18000  | [1]       |
| $k_S$                                 | 0.125  | [1]       |
| $g_{Sl}$                              | 50000  | Estimated |
| $k_{Sl}$                              | 0.1155 | [2]       |
| $g_{m_{Sl}}$                          | 90     | Estimated |
| $k_{m_{Sl}}$                          | 0.5    | Estimated |
| $\lambda_{Sl,\mu_{200}}$              | 0.4    | [3]       |
| $\lambda_{Sl,S}$                      | 0.5    | [4]       |
| $\lambda_{S,S}$                       | 0.4    | [5]       |
| $\lambda_{S,m_{Sl}}$                  | 0.5    | [4]       |
| $n_{Sl,\mu_{200}}$                    | 1      | [3]       |
| $n_{Sl,S}$                            | 3      | [6]       |
| $n_{S,S}$                             | 5      | [6]       |
| $n_{S,m_{Sl}}$                        | 1      | [6]       |
| $Sl_{\mu_{200}}^0$                    | 220000 | Estimated |
| $Sl_S^0$                              | 225000 | Estimated |
| $S_S^0$                               | 300000 | Estimated |
| $S_{m_{Sl}}^0$                        | 180000 | Estimated |
| nIs                                   | 2      | [7]       |
| I <sup>0</sup> S                      | 100000 | [7]       |
| $\lambda_{I,S}$                       | 3      | [7]       |
| $g_K$                                 | 50000  |           |
| $k_K$                                 | 0.1732 | [8]       |
| $\lambda_{K,S}$                       | 0.5    | [9]       |
| $\lambda_{K,m_{Sl}}$                  | 0.25   | [10]      |
| $\lambda_{S,K}$                       | 0.25   | [11]      |
| $\lambda_{Sl,K}$                      | 0.5    | [10]      |
| $n_{K,S}$                             | 2      | [9]       |
| $n_{K,m_{Sl}}$                        | 2      | [10]      |
| $n_{S,K}$                             | 2      | estimated |
| $n_{Sl,K}$                            | 4      | [10]      |
| $\lambda_{K,K}$                       | 2      | [12]      |
| $n_{K,K}$                             | 3      | [13]      |
| $S_K^0$                               | 180000 | Estimated |
| $K_{m_{Sl}}^0$                        | 300000 | Estimated |
| $Sl_K^0$                              | 225000 | Estimated |
| $K_K^0$                               | 250000 | Estimated |
| $K_S^0$                               | 275000 | Estimated |

## Datasets Used in Kaplan-Meier analysis:

| Dataset                          | n(High) | n(Low) |
|----------------------------------|---------|--------|
| GSE42568 (Breast Cancer Sample)  | 52      | 52     |
| GSE45255 (Breast Cancer Sample)  | 67      | 67     |
| GSE30219 (Lung Cancer Sample)    | 147     | 146    |
| CaArray (Lung Cancer Sample)     | 234     | 234    |
| GSE30161 (Ovarian Cancer Sample) | 28      | 30     |
| GSE26712 (Ovarian Cancer Sample) | 60      | 124    |

## Supplementary figures:

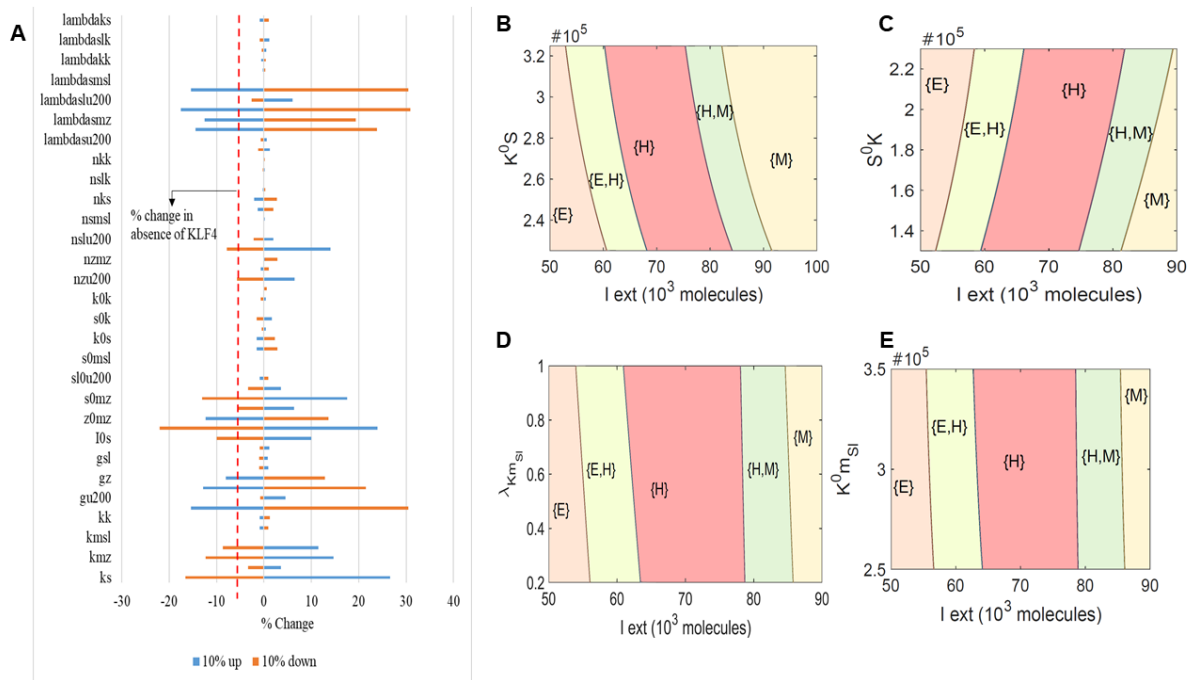

**Figure S1:** **A)** Sensitivity analysis indicating percent change in the interval of external EMT signal levels for stable hybrid E/M region, when corresponding parameter values are varied by  $\pm 10\%$ . The red dotted line indicates the percent change in the stable hybrid region in the absence of KLF4 (core network) when compared to the coupled network with KLF4. **B)** Phase diagrams for the KLF4 network driven by an external signal (I) for varying threshold levels of KLF4 needed for repression on SNAIL. **C)** Phase diagrams for the KLF4 network driven by an external signal (I) for varying threshold levels of SNAIL needed for repression on KLF4. **D)** Phase diagrams for the KLF4 network driven by an external signal (I) for varying strength of repression on SLUG mRNA by KLF4. **E)** Phase diagrams for the KLF4 network driven by an external signal (I) for varying threshold levels of KLF4 needed for repression on SLUG.

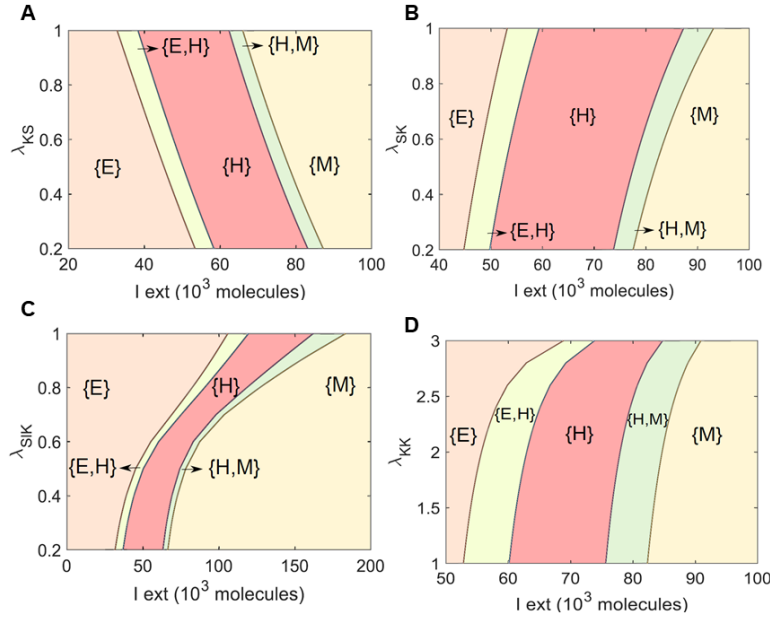

**Figure S2: Effect of SLUG self-activation** **A)** Phase diagrams for the KLF4 network with SLUG self-activation driven by an external signal ( $I$ ) for varying strength of repression on SNAIL by KLF4. **B)** Phase diagrams for the KLF4 network with SLUG self-activation driven by an external signal ( $I$ ) for varying strength of repression on KLF4 by SNAIL. **C)** Phase diagrams for the KLF4 network with SLUG self-activation driven by an external signal ( $I$ ) for varying strength of repression on SLUG by KLF4. **D)** Phase diagrams for the KLF4 network with SLUG self-activation driven by an external signal ( $I$ ) for varying strength of KLF4 self-activation.

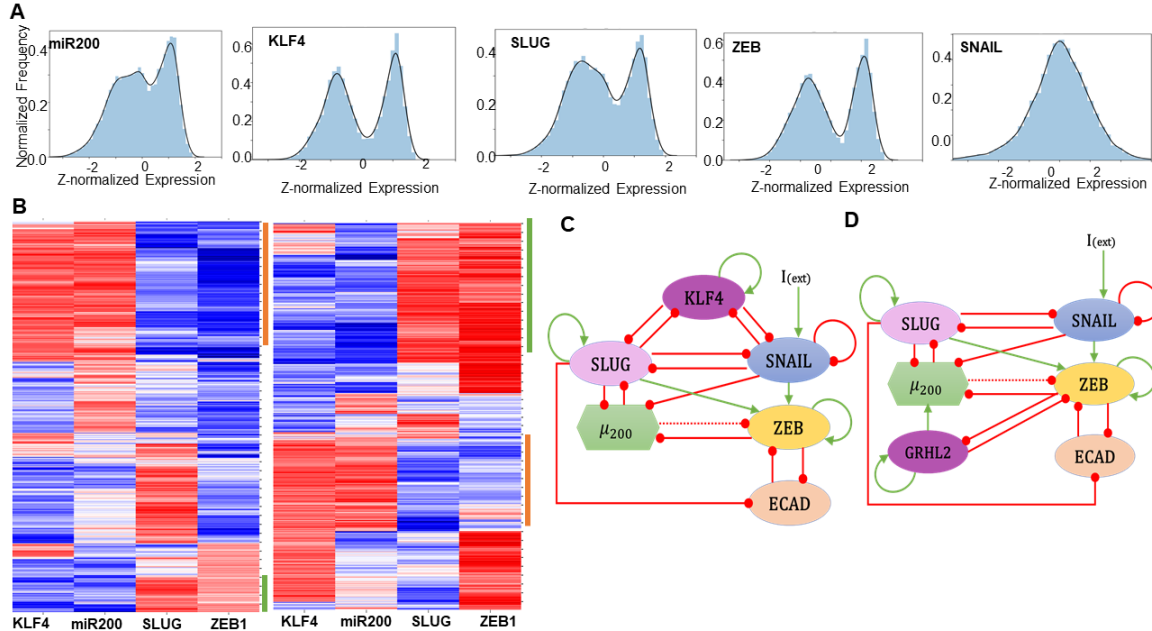

**Figure S3: RACIPE analysis of KLF4-EMT circuit.** **A)** Normalized histograms of the expression levels of the nodes in the GRN. **B)** Heatmap showing the steady-state expression levels of a single replicate involving ZEB down-expression (ZEB DE) on the simulated GRN (**Left panel**). Heatmap showing the steady-state expression levels of a single replicate involving ZEB over-expression (ZEB OE) on the simulated GRN (**Right panel**). Green represents mesenchymal phenotype and orange represents epithelial phenotype. **C)** Extended KLF4 gene regulatory network **D)** GRN containing GRHL2 used for RACIPE simulations

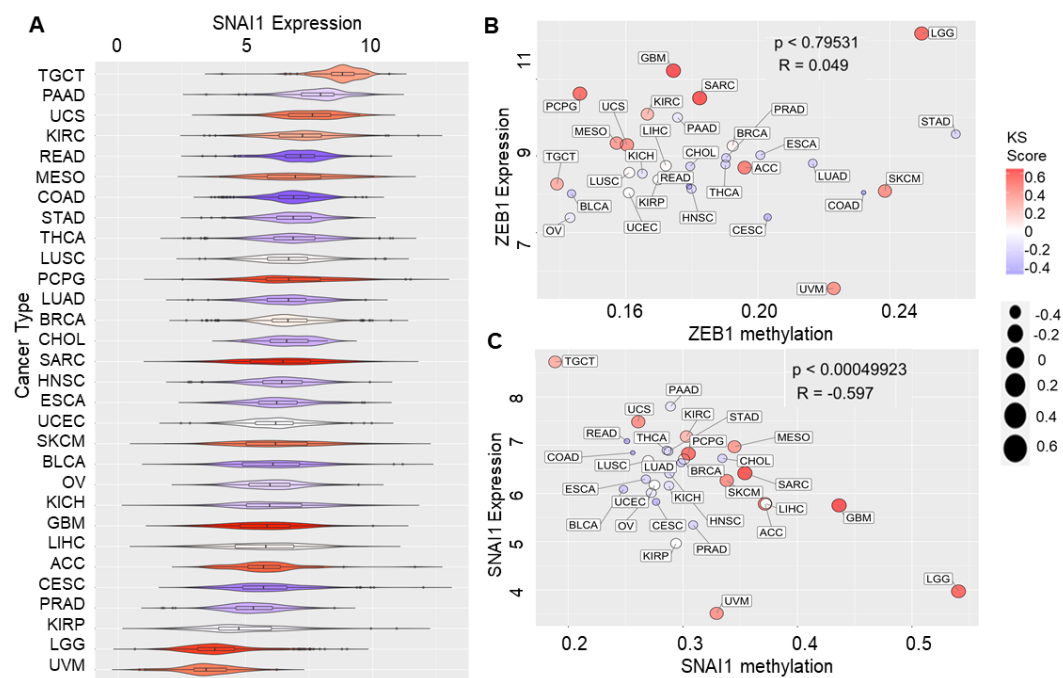

**Figure S4: A)** SNAI1 expression in TCGA cancers in relation to KS score **B)** ZEB1 expression in TCGA cancers in relation to its methylation status **C)** SNAI1 expression in TCGA cancers in relation to its methylation status

## References:

1. Lu, M.; Jolly, M. K.; Levine, H.; Onuchic, J. N.; Ben-Jacob, E. MicroRNA-based regulation of epithelial-hybrid-mesenchymal fate determination. *Proc. Natl. Acad. Sci.* **2013**, *110*, 18144–18149.
2. Molina-Ortiz, P.; Villarejo, A.; MacPherson, M.; Santos, V.; Montes, A.; Souchelnytskyi, S.; Portillo, F.; Cano, A. Characterization of the SNAG and SLUG domains of Snail2 in the repression of E-cadherin and EMT induction: Modulation by serine 4 phosphorylation. *PLoS One* **2012**, *7*, e36132.
3. Liu, Y. N.; Yin, J. J.; Abou-Kheir, W.; Hynes, P. G.; Casey, O. M.; Fang, L.; Yi, M.; Stephens, R. M.; Seng, V.; Sheppard-Tillman, H.; Martin, P.; Kelly, K. MiR-1 and miR-200 inhibit EMT via Slug-dependent and tumorigenesis via Slug-independent mechanisms. *Oncogene* **2013**, *32*, 296–306.
4. Nakamura, R.; Ishii, H.; Endo, K.; Hotta, A.; Fujii, E.; Miyazawa, K.; Saitoh, M. Reciprocal expression of slug and snail in human oral cancer cells. *PLoS One* **2018**, *13*, e0199442.
5. Peiró, S.; Escrivà, M.; Puig, I.; Barberà, M. J.; Dave, N.; Herranz, N.; Larriba, M. J.; Takkunen, M.; Francí, C.; Muñoz, A.; Virtanen, I.; Baulida, J.; García de Herreros, A. Snail1 transcriptional repressor binds to its own promoter and controls its expression. *Nucleic Acids Res.* **2006**, *34*, 2077–2084.
6. Chen, Y.; Gridley, T. The SNAI1 and SNAI2 proteins occupy their own and each other's promoter during chondrogenesis. *Biochem. Biophys. Res. Commun.* **2013**, *435*, 356–360.
7. Jolly, M. K.; Boareto, M.; Debeb, B. G.; Aceto, N.; Farach-Carson, M. C.; Woodward, W. A.; Levine, H. Inflammatory Breast Cancer: a model for investigating cluster-based dissemination. *NPJ Breast Cancer* **2017**, *3*, 21.
8. Gamper, A. M.; Qiao, X.; Kim, J.; Zhang, L.; De Simone, M. C.; Rathmell, W. K.; Wan, Y. Regulation of KLF4 Turnover Reveals an Unexpected Tissue-Specific Role of pVHL in Tumorigenesis. *Mol. Cell* **2012**, *45*, 233–243.
9. Yori, J. L.; Seachrist, D. D.; Johnson, E.; Lozada, K. L.; Schiemann, W. P.; Keri, R. A. Krüppel-like Factor 4 Inhibits Tumorigenic Progression and Metastasis in a Mouse Model of Breast Cancer. *Neoplasia* **2011**, *13*, 601–610.
10. Liu, Y.-N.; Abou-Kheir, W.; Yin, J. J.; Fang, L.; Hynes, P.; Casey, O.; Hu, D.; Wan, Y.; Seng, V.; Sheppard-Tillman, H.; Martin, P.; Kelly, K. Critical and Reciprocal Regulation of KLF4 and SLUG in Transforming Growth Factor  $\alpha$ -Initiated Prostate Cancer Epithelial-Mesenchymal Transition. *Mol. Cell. Biol.* **2012**, *32*, 941–953.
11. Li, Z.; Huang, J.; Shen, S.; Ding, Z.; Luo, Q.; Chen, Z.; Lu, S. SIRT6 drives epithelial-to-mesenchymal transition and metastasis in non-small cell lung cancer via snail-dependent transrepression of KLF4. *J. Exp. Clin. Cancer Res.* **2018**, *37*, 323.
12. Dang, D. T. Opposing effects of Kruppel-like factor 4 (gut-enriched Kruppel-like factor) and Kruppel-like factor 5 (intestinal-enriched Kruppel-like factor) on the promoter of the Kruppel-like factor 4 gene. *Nucleic Acids Res.* **2002**, *30*, 2736–2741.
13. Mahatan, C. S.; Kaestner, K. H.; Geiman, D. E.; Yang, V. W. Characterization of the structure and regulation of the murine gene encoding gut-enriched Krüppel-like factor (Krüppel-like factor 4). *Nucleic Acids Res.* **1999**, *27*, 4562–4569.
